# Supplementary material for: Biphasic nature of lipid bilayers assembled on silica nanoparticles and evidence for an interdigitated phase
Source: Royal Society of Chemistry journal article supplement (doi:10.1039/d2sm01517j), 2023-01-01
Supplement: d2sm01517j1.pdf [file d2sm01517j1.pdf]

# Biphasic Nature of Lipid Bilayers Assembled on Silica Nanoparticles and Evidence for an Interdigitated Phase

*Dillan Stengel, Rich Thai, Yuan Li, Nikki M. Peters, Gregory P. Holland\**

Department of Chemistry and Biochemistry, San Diego State University, 5500 Campanile Dr.  
San Diego CA, 92182-1030 USA

\*Corresponding Author Email: [gholland@sdsu.edu](mailto:gholland@sdsu.edu)

**A**

|                         | Size (d.nm):  | % Volume: | St Dev (d.nm): |
|-------------------------|---------------|-----------|----------------|
| Z-Average (d.nm): 32.84 | Peak 1: 4.072 | 99.9      | 1.290          |
| Pdl: 0.021              | Peak 2: 92.19 | 0.1       | 83.69          |
| Intercept: 0.754        | Peak 3: 0.000 | 0.0       | 0.000          |

Result quality : **Good**

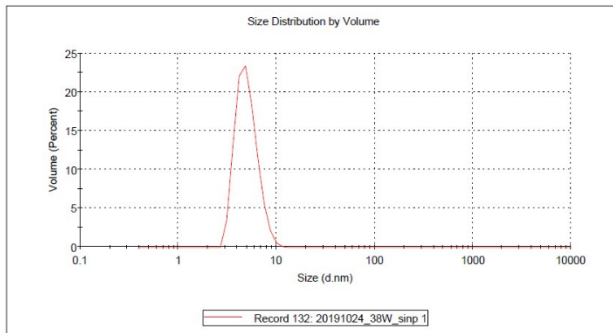

**B**

|                         | Size (d.nm):  | % Volume: | St Dev (d.nm): |
|-------------------------|---------------|-----------|----------------|
| Z-Average (d.nm): 75.93 | Peak 1: 53.37 | 99.6      | 29.84          |
| Pdl: 0.206              | Peak 2: 4802  | 0.4       | 870.5          |
| Intercept: 0.937        | Peak 3: 0.000 | 0.0       | 0.000          |

Result quality : **Good**

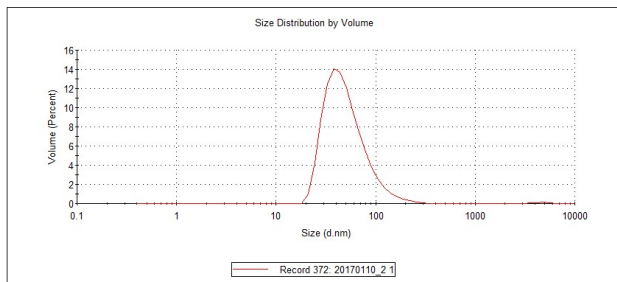

**C**

|                         | Size (d.nm):  | % Number: | St Dev (d.nm): |
|-------------------------|---------------|-----------|----------------|
| Z-Average (d.nm): 75.93 | Peak 1: 35.30 | 100.0     | 11.77          |
| Pdl: 0.206              | Peak 2: 0.000 | 0.0       | 0.000          |
| Intercept: 0.937        | Peak 3: 0.000 | 0.0       | 0.000          |

Result quality : **Good**

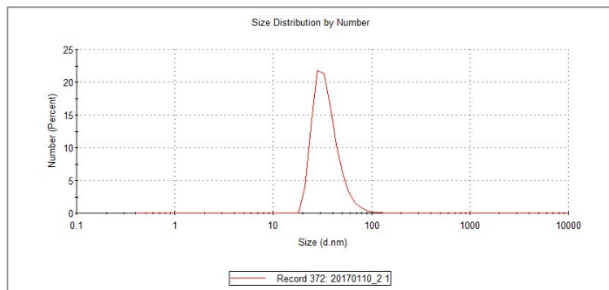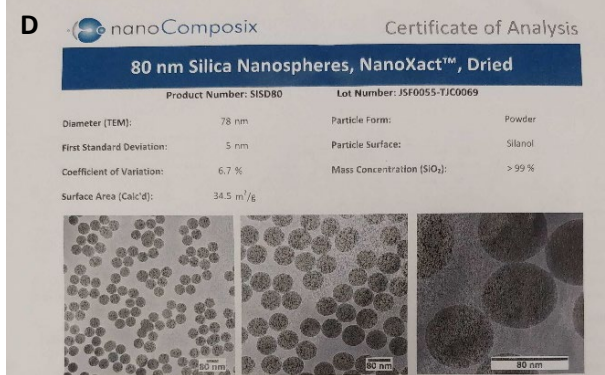

**E**

|                         | Size (d.nm):  | % Volume: | St Dev (d.nm): |
|-------------------------|---------------|-----------|----------------|
| Z-Average (d.nm): 337.9 | Peak 1: 381.3 | 100.0     | 101.1          |
| Pdl: 0.060              | Peak 2: 0.000 | 0.0       | 0.000          |
| Intercept: 0.918        | Peak 3: 0.000 | 0.0       | 0.000          |

Result quality : **Good**

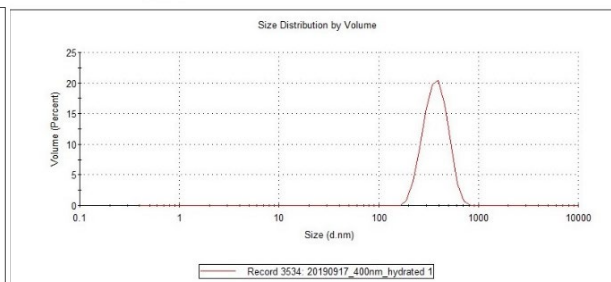

**F**

|                         | Size (d.nm):  | % Volume: | St Dev (d.nm): |
|-------------------------|---------------|-----------|----------------|
| Z-Average (d.nm): 129.4 | Peak 1: 127.5 | 100.0     | 41.16          |
| Pdl: 0.063              | Peak 2: 0.000 | 0.0       | 0.000          |
| Intercept: 0.944        | Peak 3: 0.000 | 0.0       | 0.000          |

Result quality : **Good**

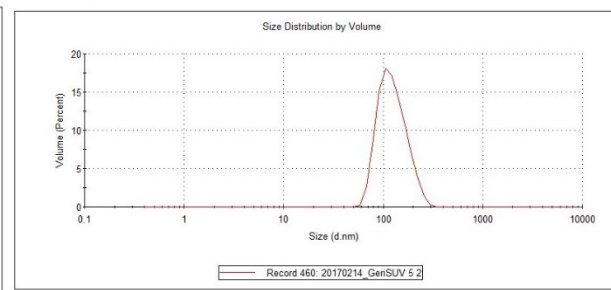

**Figure S1.** DLS of Stöber-synthesized nanoparticles and DMPC SUVs after extrusion. The nominal diameters for each are: A, 4 nm; B, 53 nm (by volume); C, 35 nm (by number); D, 80 nm; E, 400 nm; F, 128 nm for SUVs extruded with a 100 nm filter. The graphs in B and C are from the same sample, but are reported using either the volume distribution (B) or number distribution (C). The number distribution more accurately reflects the total surface area of this sample which is reported in Supplementary Table 1. Figure S2B shows TEM images of this sample. The certificate of analysis for the nominal 80 nm particles (D) are from the manufacturer.

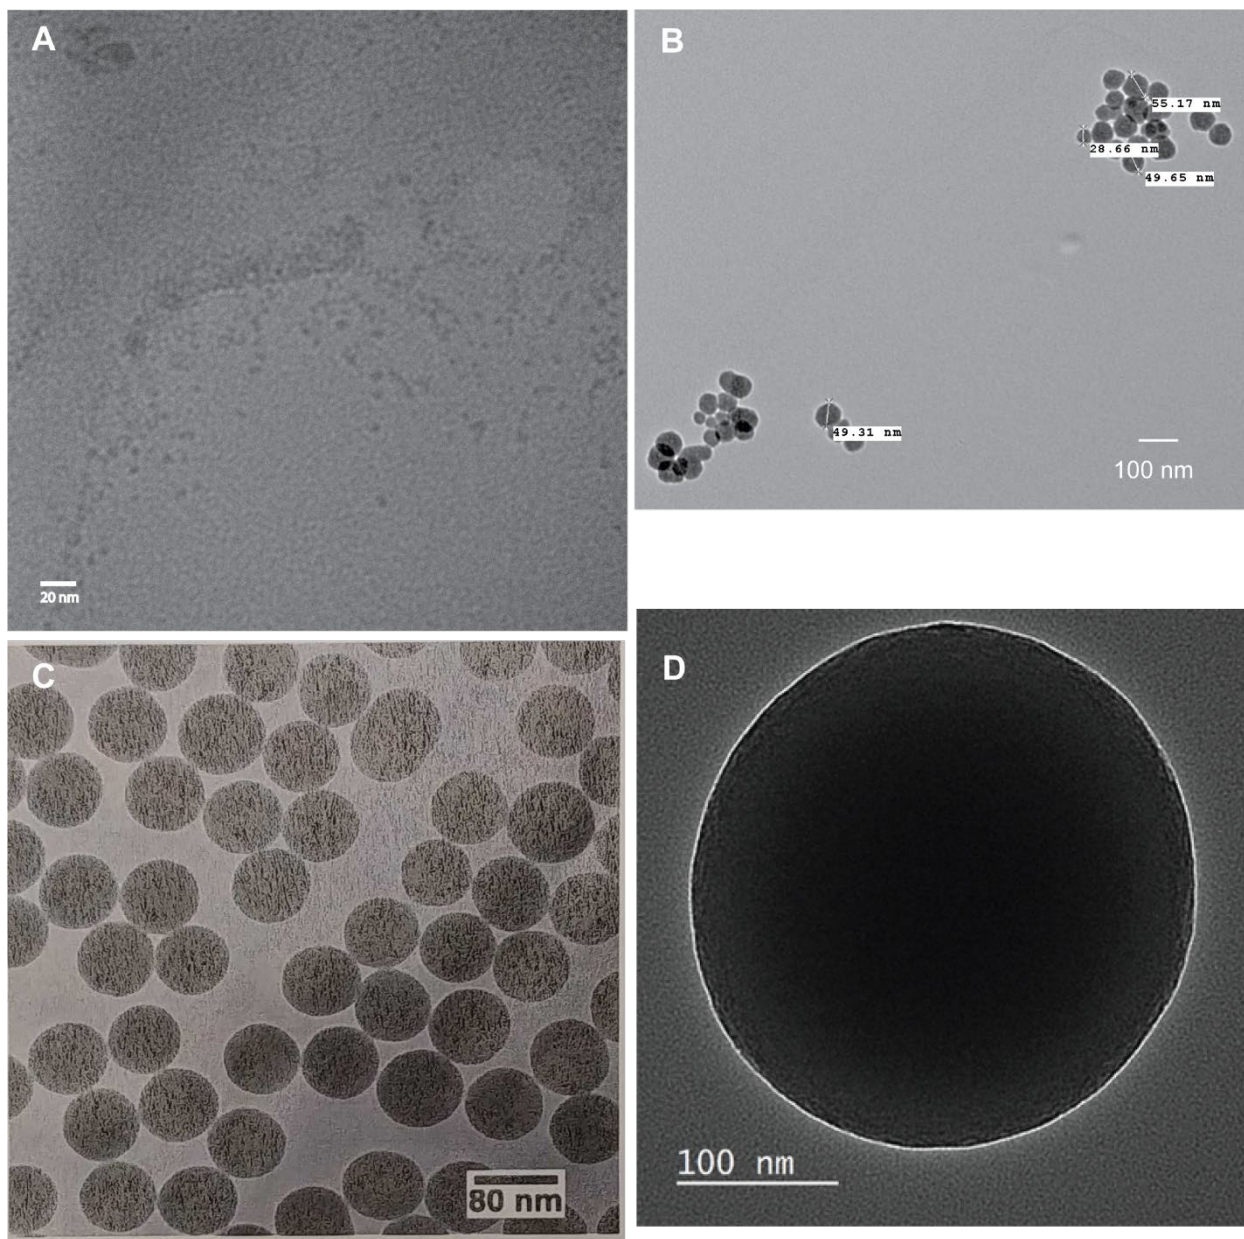

**Figure S2.** TEM images of uncoated silica nanoparticles. A, 4 nm. B, 35 nm. C, 78 nm, and D, 381 nm. Sizes reported here are from DLS data in Figure S1. Samples were imaged using an FEC Tecnai 12 TEM.

**Table S1.** Calculated lipid weight loss on various SSVs from TGA. Nanoparticle sizes are listed as  $\pm$  SD that is based on DLS or a certificate of analysis (Figure S1). Bare nanoparticles were soaked in water before TGA analysis to calculate the loss of water adsorbed to the uncoated nanoparticles. Calculated weight loss is the difference between the coated nanoparticles and the soaked bare nanoparticles (representative TGA data shown in Figure S3). Theoretical weight loss is assuming a planar surface of a single bilayer of lipids on the nanoparticle. Because of the large distribution in the 53 nm sample ( $\pm$  30 nm, Supplementary Figure 2) we have also included the size by number density (35 nm), which is in better agreement with the theoretical weight loss and TEM (Figure S2).

| Diameter (nm) | Coated Start (mg) | Coated End (mg) | % wt Loss | Bare Start (mg) | Bare Finish (mg) | % wt Loss | Calculated Weight Loss (%) | Theoretical Weight Loss (%) |
|---------------|-------------------|-----------------|-----------|-----------------|------------------|-----------|----------------------------|-----------------------------|
| 381 $\pm$ 101 | 49.42             | 44.77           | 9.4       | 14.86           | 13.85            | 6.8       | 2.61                       | 2.46                        |
| 78 $\pm$ 5    | 47.31             | 40.42           | 14.6      | 11.5            | 11.1             | 3.5       | 11.10                      | 10.31                       |
| 53 $\pm$ 30   | 43.94             | 33.51           | 23.7      | 30.18           | 29.66            | 1.7       | 22.03                      | 15.25                       |
| 35 $\pm$ 12 † |                   |                 |           |                 |                  |           |                            | 21.42                       |
| 4 $\pm$ 1     | 25.01             | 5.97            | 76.1      | 5.55            | 5.37             | 3.2       | 72.9                       | 70.50                       |

† size by number

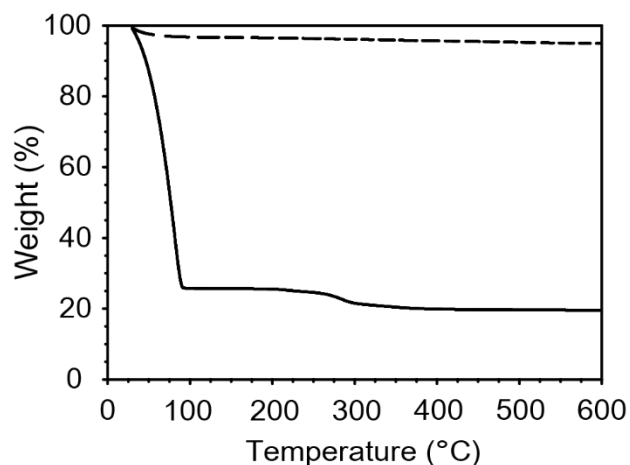

**Figure S3.** Example TGA trace of bare nanoparticles in water (dashed line) and DMPC-coated 78 nm silica nanoparticles (solid line). Weight loss of the coated nanoparticles was calculated from the weight at 50°C minus the weight at 600°C.

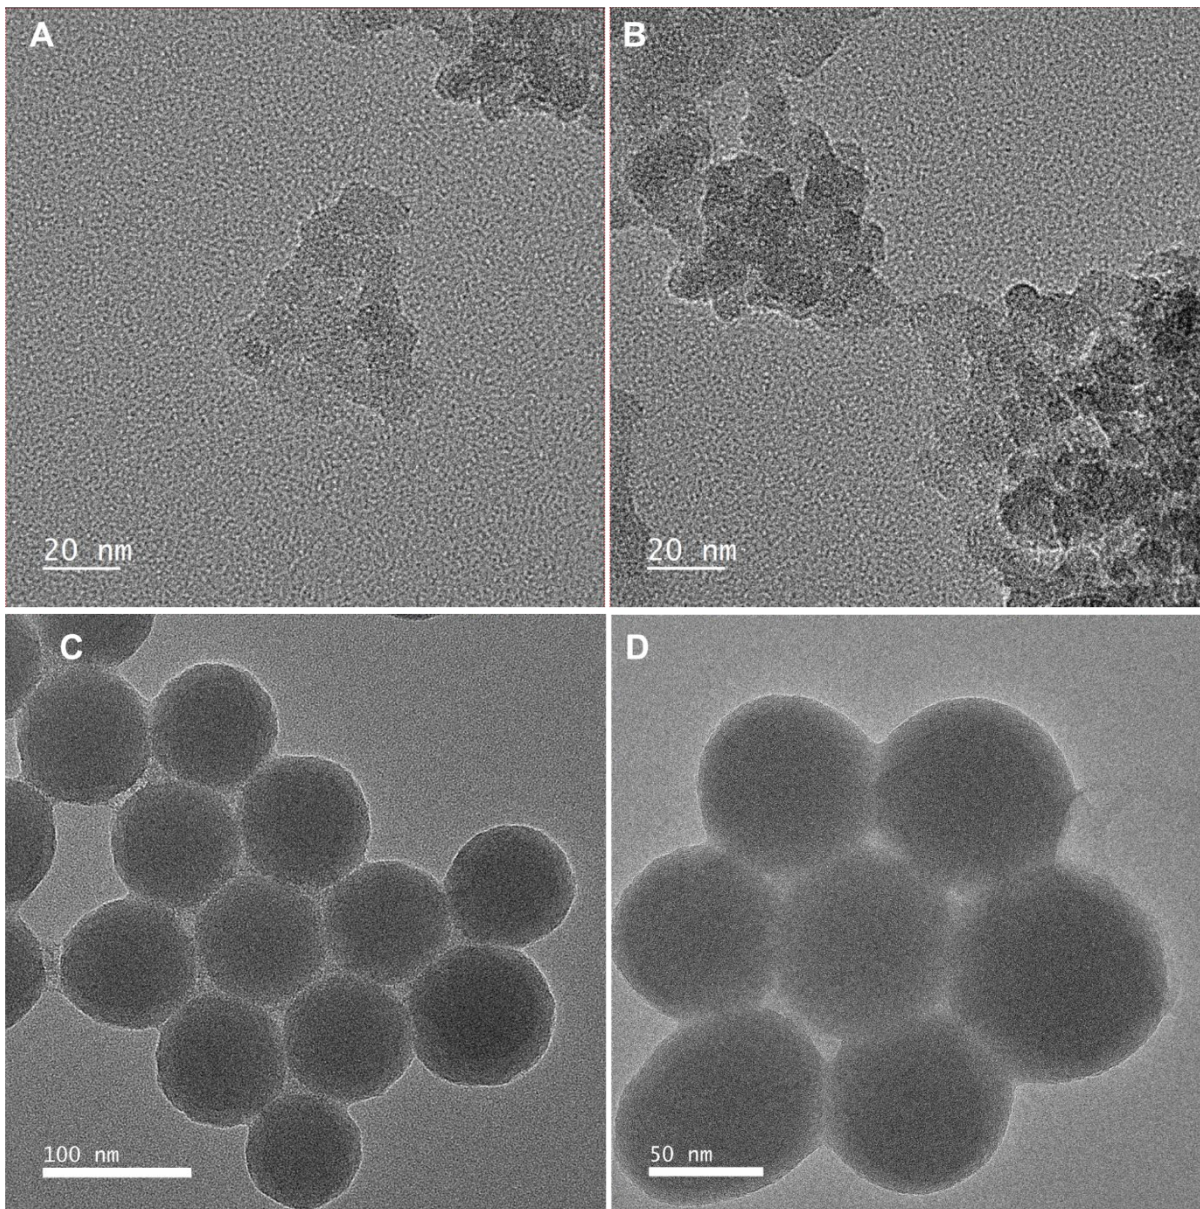

**Figure S4.** TEM images of DMPC-coated silica nanoparticles. A and B, 4 nm. C and D, 78 nm. Sizes reported here are from DLS data shown in Figure S1. Samples were imaged using a FEI Tecnai 12 TEM.

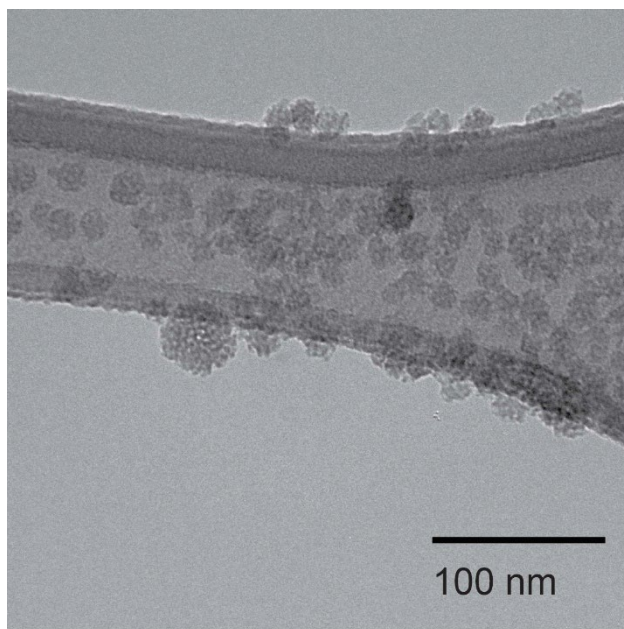

| Diameter (nm) | Coated Start (mg) | Coated End (mg) | % wt Loss | Bare Start (mg) | Bare Finish (mg) | % wt Loss | Calculated Weight Loss (%) | Theoretical Weight Loss (%)                        |
|---------------|-------------------|-----------------|-----------|-----------------|------------------|-----------|----------------------------|----------------------------------------------------|
| 20 nm         | 4.785             | 3.889           | 18.725    | 6.579           | 6.371            | 3.165     | 15.56                      | 67.57 (using surface area 545.9 m <sup>2</sup> /g) |
|               |                   |                 |           |                 |                  |           |                            |                                                    |

**Figure S5.** TEM image of 20 nm MSN nanoparticles with 2 nm pores (top) and TGA data for lipid coated MSN SSVs. The calculated weight loss from TGA roughly agrees with that expected for a nonporous, colloidal silica sphere (Table S1) indicating that the lipid bilayer is not incorporated in the pore space and only exists on the surface of the particle analogous to the colloidal SSVs.

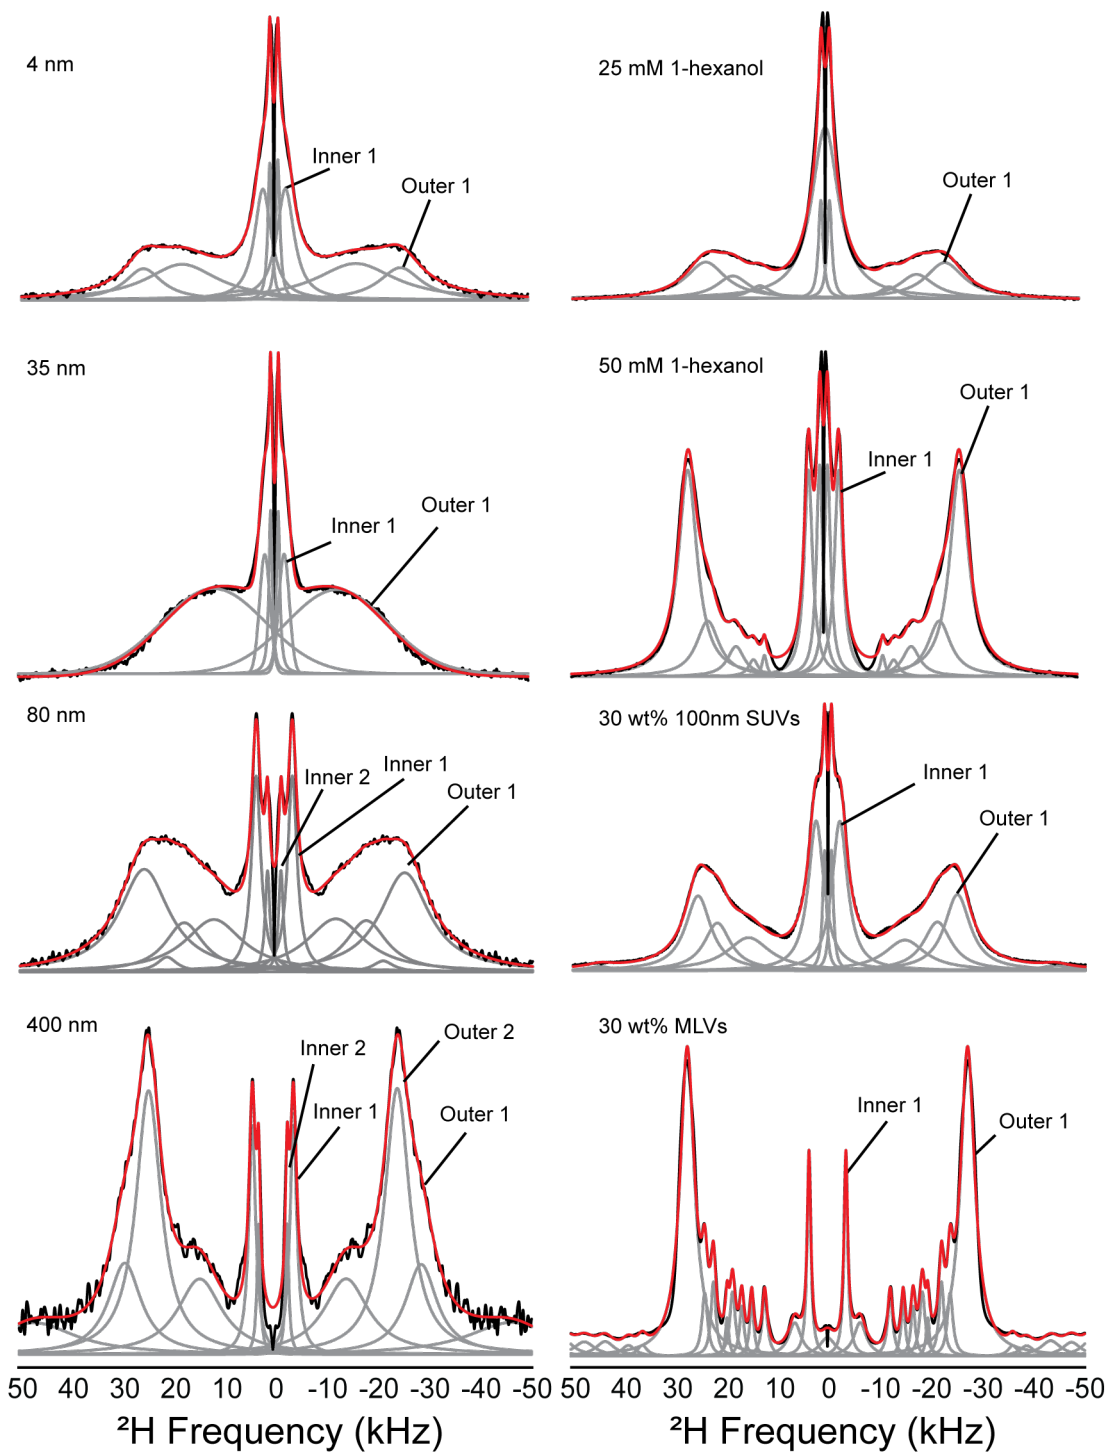

**Figure S6.** Deconvolutions of de-Paked  $^2\text{H}$  solid-state NMR spectra for SSVs and lipid bilayer controls. The splitting for the inner-most and outermost peaks correspond to the terminal methyl  $\text{CD}_3$  and  $\text{CD}_2$  groups nearest the head group, respectively. The  $^2\text{H}$  splittings for SSVs are reported in the main text, Table 1. DMFIT was used to deconvolute the spectra.

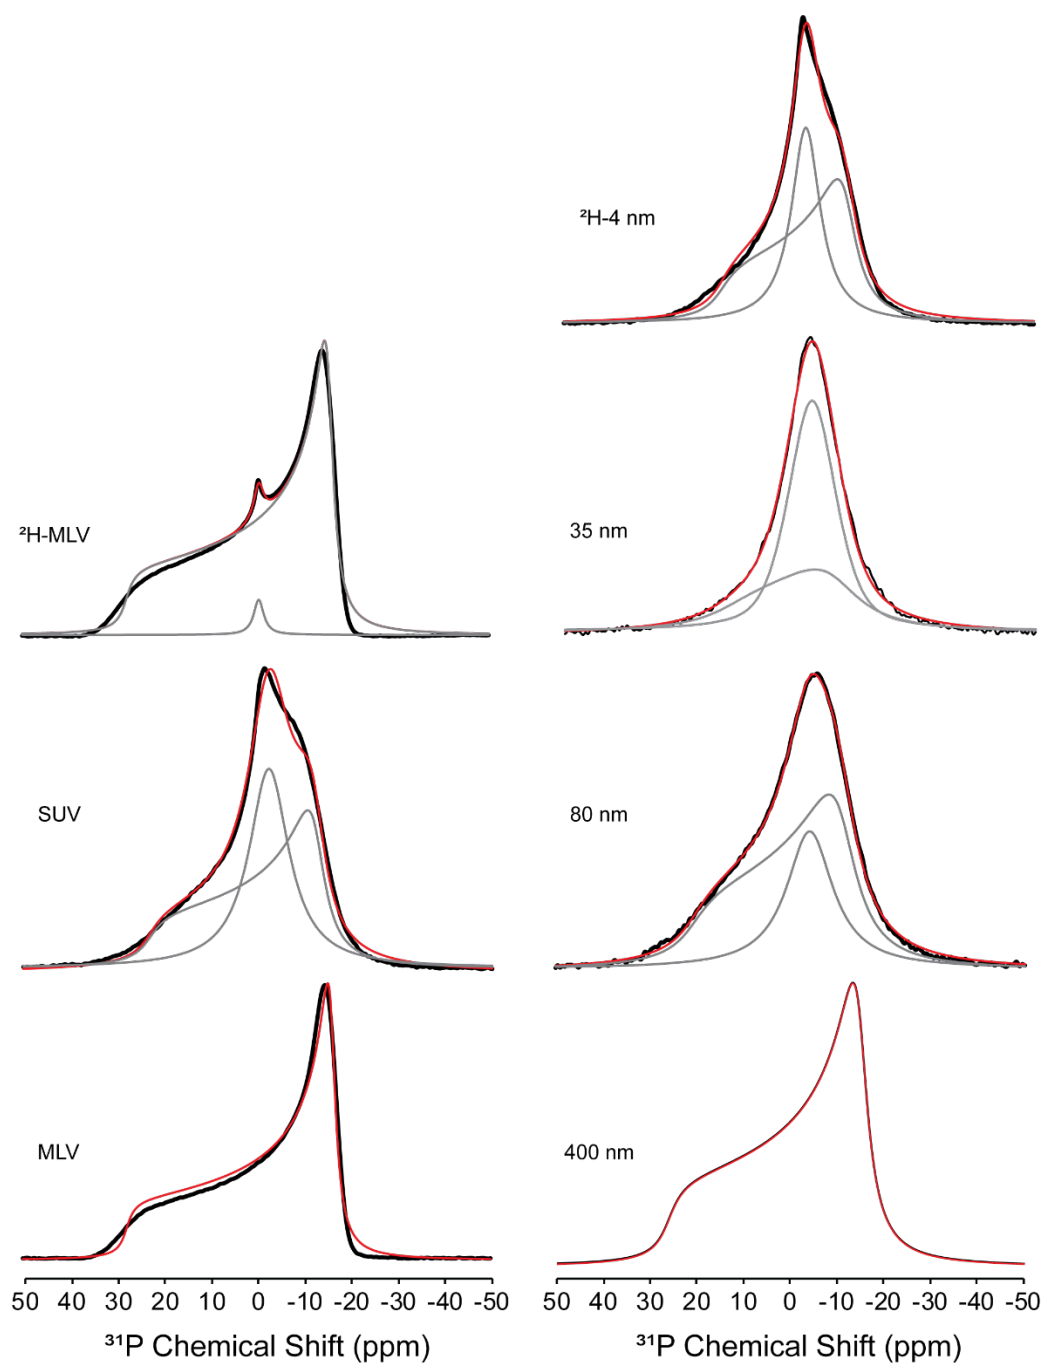

**Figure S7.**  $^{31}\text{P}$  CSA fits for SSVs. Deconvoluted isotropic and CSA fits are in grey and their sum shown in red. The original spectra are black. The  $^{31}\text{P}$  CSA and ratio of anisotropic to isotropic components extracted from the fits is presented in Table 2 of the main text along with CSA parameters. The asymmetry parameter ( $\eta$ ) was 0 for all CSA fits consistent with the  $L_{\alpha}$  lamellar bilayer phase.



**Table S2.**  $^{31}\text{P}$  NMR  $T_1$  and  $T_2$  relaxation times of DMPC lipid samples. The SUV and MLV samples are 30 wt%.

| °C                      | $T_1$ (ms) |       |       |        |            |            |      |
|-------------------------|------------|-------|-------|--------|------------|------------|------|
|                         | 4 nm*      | 35 nm | 80 nm | 400 nm | 100 nm SUV | 400 nm SUV | MLV  |
| <b>50</b>               |            |       |       |        |            |            | 735  |
| <b>40</b>               |            |       |       |        |            | 132        | 656  |
| <b>35</b>               | 601        | 309   | 656   | 533    | 643        | 139        | 635  |
| <b>30</b>               | 597        | 323   | 654   | 563    | 650        | 164        | 639  |
| <b>25</b>               | 635        | 352   | 710   | 551    | 682        | 192        | 647  |
| <b>20</b>               | 752        | 481   | 897   | 896    | 804        | 253        | 782  |
| <b>15</b>               | 866        | 580   | 1019  | 894    | 806        | 295        | 902  |
| <b>10</b>               | 974        | 616   | 1153  | 884    | 972        | 342        | 906  |
| <b>5</b>                | 1074       |       |       |        |            |            |      |
| $T_2$ ( $\mu\text{s}$ ) |            |       |       |        |            |            |      |
| <b>50</b>               |            |       |       |        |            |            | 923  |
| <b>40</b>               |            |       |       |        |            | 206        | 1004 |
| <b>35</b>               | 513        | 400   | 470   | 1057   | 718        | 247        | 1407 |
| <b>30</b>               | 535        | 382   | 495   | 1224   | 810        | 281        | 1596 |
| <b>25</b>               | 555        | 346   | 569   | 1263   | 1031       | 359        | 2826 |
| <b>20</b>               | 587        | 313   | 672   | 965    | 1018       | 621        | 939  |
| <b>15</b>               | 867        | 240   | 730   | 889    | 1030       | 693        | 1009 |
| <b>10</b>               | 951        | 253   | 784   | 873    | 912        | 663        | 951  |
| <b>5</b>                | 853        |       |       |        |            |            |      |

\* coated with DMPC- $d_{54}$

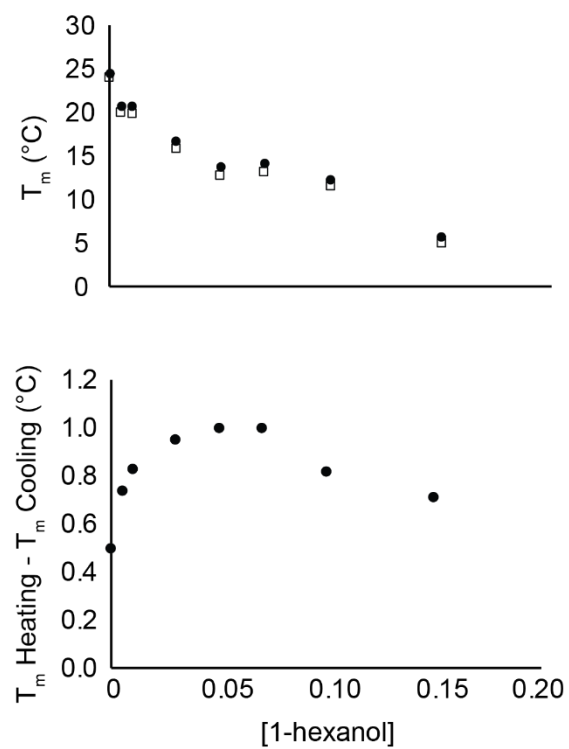

**Figure S8.** Recorded DSC  $T_m$  of SUVs (top) during heating (circles) and cooling (squares) cycles and their differences (bottom) as a function of 1-hexanol concentration. The greatest difference is observed at 50 mM 1-hexanol and indicates the largest degree of interdigitation occurs at this concentration.

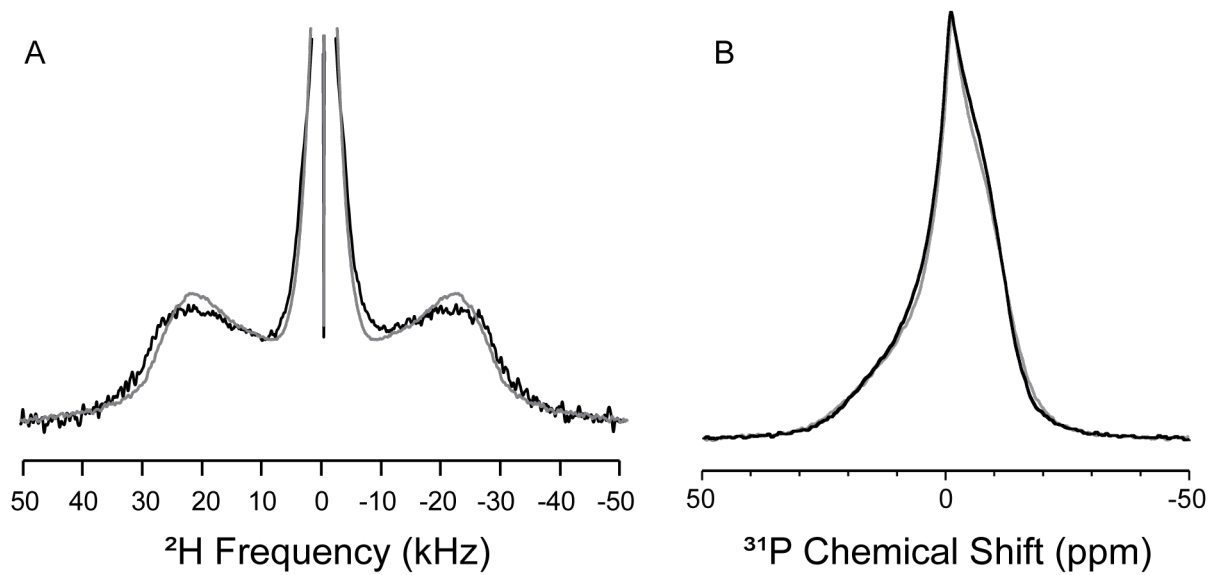

**Figure S9.** De-Paked  $^2\text{H}$  (A) and  $^{31}\text{P}$  (B) solid-state NMR spectra of 4 nm SSVs (black) and 100nm SUVs interdigitated with 25 mM 1-hexanol at 20 wt% (grey) and 30°C.

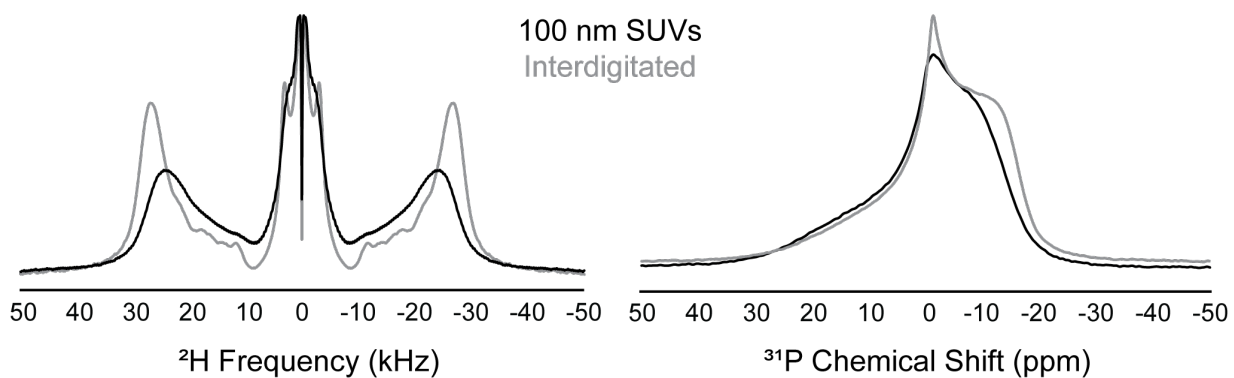

**Figure S10.** Static solid-state  $^2\text{H}$  and  $^{31}\text{P}$  NMR spectra of 20 wt% DMPC- $\text{d}_{54}$  SUVs (black) and the same sample interdigitated with 50 mM 1-hexanol (grey) at 30 °C. In the  $^2\text{H}$  spectra, the splitting for the outer peaks is wider for the interdigitated spectra compared to the SUV and the  $^{31}\text{P}$  spectrum displays a slightly larger CSA for the interdigitated phase.
